# Supplementary material for: A MoN nanosheet array supported on carbon cloth as an efficient electrochemical sensor for nitrite detection
Source: Royal Society of Chemistry journal article supplement (doi:10.1039/c9an01270b), 2019-01-01
Supplement: c9an01270b1.pdf [file c9an01270b1.pdf]

## Electronic Supplementary Information

### Experimental section

*Materials:*  $\text{Na}_2\text{MoO}_4 \cdot 2\text{H}_2\text{O}$ ,  $\text{CH}_4\text{N}_2\text{S}$ ,  $\text{HNO}_3$ ,  $\text{C}_2\text{H}_5\text{OH}$ ,  $\text{CH}_3\text{COOH}$ ,  $\text{NaOH}$ ,  $\text{HCl}$ ,  $\text{Na}_2\text{SO}_4$ . CC was provided by Hongshan District, Wuhan Instrument Surgical Instruments business. The water used throughout all experiments was purified through a Millipore system. All the reagents were used as received without further purification.

*Preparation of MoN NA/CC:* MoN NA/CC was prepared as follows. 0.242 g  $\text{Na}_2\text{MoO}_4 \cdot 2\text{H}_2\text{O}$  was dissolved in 22 mL deionized water in a 50 mL beaker, into which 0.305 g thiourea was added. After gently stirred for 30 min, the solution was then transferred to a 50 mL Teflon-lined stainless steel autoclave, and a piece of CC ( $2\text{ cm} \times 3\text{ cm}$ ) was immersed into the autoclave contained solution. The autoclave was sealed and maintained at  $220\text{ }^\circ\text{C}$  for 24 h in an electric oven. After the autoclave cooled down naturally to room temperature, the precursor on CC was taken out and rinsed with deionized water several times, then dried in air at  $60\text{ }^\circ\text{C}$  in air. To prepare MoN NA/CC, the precursor was placed in the furnace and heated to  $800\text{ }^\circ\text{C}$  for 3 h with a heating speed of  $5\text{ }^\circ\text{C min}^{-1}$  under a flowing  $\text{NH}_3$  atmosphere. The system was allowed to cool down to room temperature naturally still under a flowing  $\text{NH}_3$  atmosphere. Finally, the black MoN NA/CC was collected.

*Characterizations:* Powder X-ray diffraction (XRD) data were acquired on a RigakuD/MAX 2550 diffractometer with Cu  $K\alpha$  radiation ( $\lambda=1.5418\text{ \AA}$ ). Scanning electron microscopy (SEM) images were collected from the tungsten lamp-equipped SU3500 scanning electron microscope at an accelerating voltage of 20 kV (HITACHI, Japan). Transmission electron microscopy (TEM) measurements were made on a Hitachi H-8100 electron microscopy (Hitachi, Tokyo, Japan) with an accelerating voltage of 200 kV. X-ray photoelectron spectroscopy (XPS) measurements were carried out on an ESCALABMK II X-ray photoelectron spectrometer using Mg as the exciting source.

*Electrochemical measurements:* Electrochemical measurements were performed with a CHI 660E electrochemical analyzer (CH Instruments, Inc., Shanghai) in a traditional three electrode system, using MoN NA/CC as working electrode, platinum wire as counter electrode and saturated Ag/AgCl as reference electrode. All tests were carried out at room temperature.

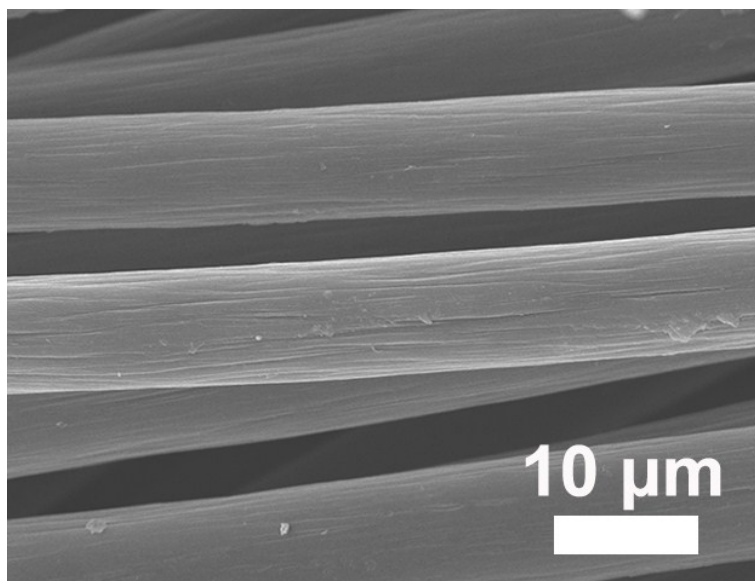

**Fig. S1.** SEM image for bare CC.

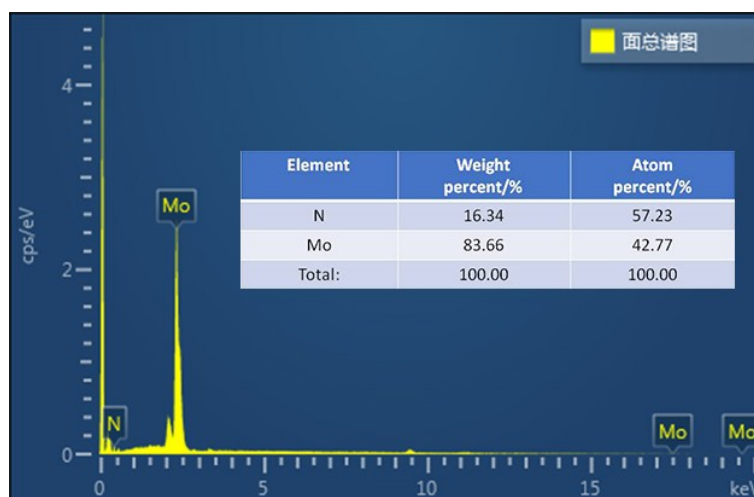

**Fig. S2.** EDX spectrum of MoN.

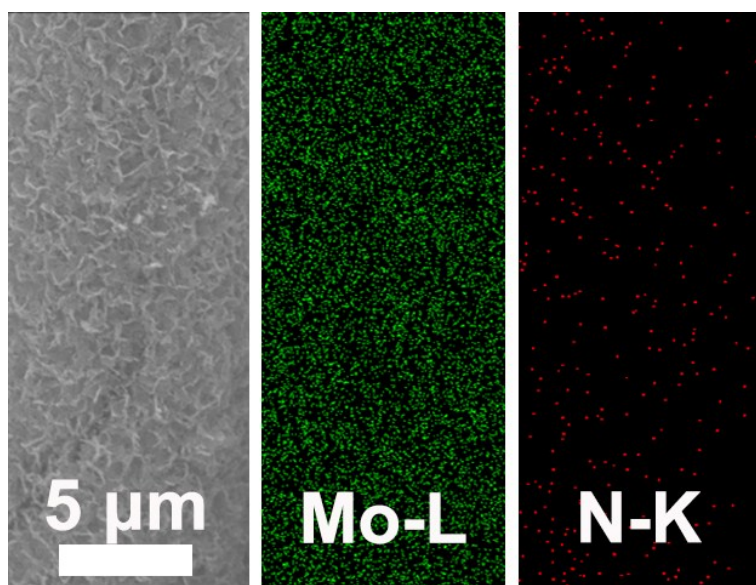

**Fig. S3.** SEM and EDX element mapping images of Mo and N elements in MoN.

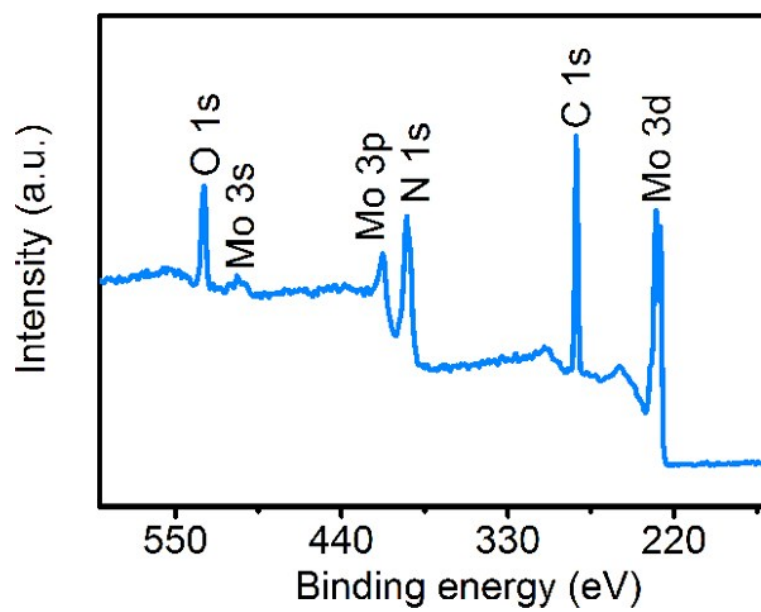

**Fig. S4.** XPS survey spectrum for MoN.

**Table S1.** Comparison of the MoN NA/CC performances for nitrite sensing with reported electrocatalysts.

| Catalyst                     | Sensitivity                                       | linear range<br>( $\mu\text{M}$ ) | Detection limit( $\mu\text{M}$ ) | Ref.      |
|------------------------------|---------------------------------------------------|-----------------------------------|----------------------------------|-----------|
| MoN NA/CC                    | $4319 \mu\text{A mM}^{-1} \text{cm}^{-2}$         | 1.0–5000                          | 0.003                            | This work |
| Cu–NDs/rGO                   | $214 \mu\text{A mM}^{-1} \text{cm}^{-2}$          | 1.25–13000                        | 0.4                              | 1         |
| Nano Au/Ch                   | $354 \mu\text{A mM}^{-1} \text{cm}^{-2}$          | 0.4–750                           | 0.1                              | 2         |
| Cu–<br>CoTCPP/MWCNTs/GC<br>E | $439 \mu\text{A mM}^{-1} \text{cm}^{-2}$          | 2.5–1100                          | 0.17                             | 3         |
| PTB/GCE                      | $470 \mu\text{A mM}^{-1} \text{cm}^{-2}$          | 0.1–15.2                          | 0.05                             | 4         |
| RGO–MWCNT–<br>Pt/Mb/RDGCE    | $165.1 \pm 26 \mu\text{A mM}^{-1} \text{cm}^{-2}$ | 1–12000                           | 0.93                             | 5         |
| CuS–MWCNT                    | $131.2 \mu\text{A mM}^{-1} \text{cm}^{-2}$        | 1–8100                            | 0.33                             | 6         |
| Ag–PAMAM                     | $265 \mu\text{A mM}^{-1} \text{cm}^{-2}$          | 4–1440                            | 0.4                              | 7         |
| EAG/SPCE                     | $126 \mu\text{A mM}^{-1} \text{cm}^{-2}$          | 0.1–16400                         | 0.038                            | 8         |
| Au/ZnO/MWCNTs                | /                                                 | 0.78–400                          | 0.4                              | 9         |
| AuCu NCNs                    | $17.55 \mu\text{A mM}^{-1}$                       | 10–4000                           | 0.2                              | 10        |
| CR–GO/GCE                    | $26.7 \mu\text{A mM}^{-1}$                        | 8.9–167                           | 1                                | 11        |
| AuNPs/SG                     | $45.44 \mu\text{A mM}^{-1}$                       | 10–3960                           | 0.2                              | 12        |

## References

- 1 D. Zhang, Y. Fang, Z. Miao, M. Ma, X. Du, S. Takahashi, J. Anzai and Q. Chen, *Electrochim. Acta*, 2013, **107**, 656–663.
- 2 P. Wang, Z. Mai, Z. Dai, Y. Li and X. Zou, *Biosens. Bioelectron.*, 2009, **24**, 3242–3247.
- 3 L. Shi, J. Pan, B. Zhou and X. Jiang, *J. Mater. Chem. B*, 2015, **3**, 9340–9348.
- 4 C. Yang, J. Xu and S. Hu, *J. Solid State Electrochem.*, 2007, **11**, 514–520.
- 5 V. Mani, B. Dinesh, S. Chen and R. Saraswathi, *Biosens. Bioelectron.*, 2014, **53**, 420–427.
- 6 S. Zhang, B. Li, Q. Sheng and J. Zheng, *J. Electroanal. Chem.*, 2016, **769**, 118–123.
- 7 D. Ning, H. Zhang and J. Zheng, *J. Electroanal. Chem.*, 2014, **717**, 29–33.
- 8 S. Palanisamy, C. Karuppiah, S. Chen and P. Periakaruppa, *J. Electroanal. Chem.*, 2014, **727**, 34–38.
- 9 A. Lin, Y. Wen, L. Zhang, B. Lu, Y. Li, Y. Jiao and H. Yang, *Electrochim. Acta*, 2011, **56**, 1030–1036.
- 10 S. Huang, L. Liu, L. Mei, J. Zhou, F. Guo, A. Wang and J. Feng, *Microchimica Acta*, 2016, **183**, 791–797.
- 11 V. Mani, A. P. Periasamy and S. Chen, *Electrochem. Commun.*, 2012, **17**, 75–78.
- 12 S. Li, G. Zhao, R. Zhang, Y. Hou, L. Liu and H. Pang, *Microchimica Acta*, 2013, **180**, 821–827.
